# Supplementary material for: Seeded growth of ZIF-8 on the surface of carbon nanotubes towards self-supporting gas separation membranes
Source: Royal Society of Chemistry journal article supplement (doi:10.1039/c3ta11483j), 2013-01-01
Supplement: c3ta11483j.pdf [file c3ta11483j.pdf]

**Supplementary materials for the manuscript entitled:**

**Seeded growth of ZIF-8 on the surface of carbon nanotubes towards self-supporting gas separation membranes**

Ludovic Dumée<sup>1,2#\*</sup>, Li He<sup>1\*</sup>, Matthew Hill<sup>3</sup>, Bo Zhu<sup>2</sup>, Mikel Duke<sup>2</sup>, Jürg Schütz<sup>3</sup>, Fengshua She<sup>1</sup>, Huanting Wang<sup>4</sup>, Stephen Gray<sup>2</sup>, Peter Hodgson<sup>1</sup>, Lingxue Kong<sup>1</sup>

1 Institute for Frontier Materials, Deakin University, Pigdons Road, 3216 Waurn Ponds, Victoria – Australia

2 Institute for Sustainability and Innovation, College of Engineering and Science, Victoria University, Hoppers lane, 3030 Werribee, Victoria – Australia

3 CSIRO Materials Science and Engineering, Private bag 10, 3168 Clayton South, Victoria – Australia

4 Department of Chemical Engineering, Monash University, 3800, Clayton, Australia

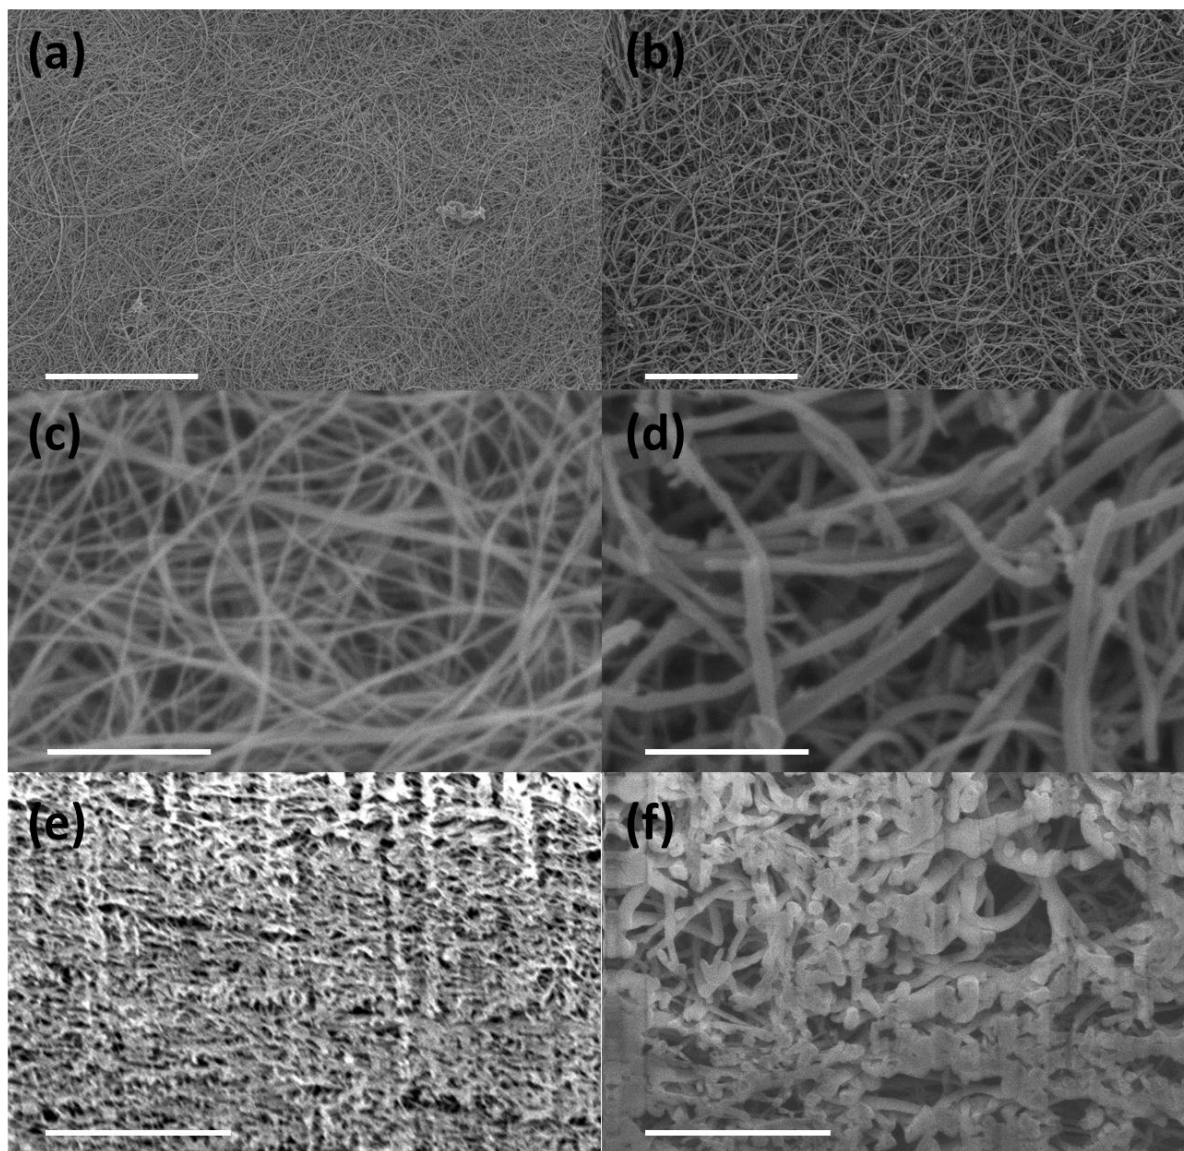

Figure S1 SEM of self-supporting BP without ZIF-8. Left and right columns respectively correspond to the fine and coarse CNTs with (a) and (b) at low magnification (scale bar 5  $\mu\text{m}$ ), (c) and (d) at high magnification (scale bar 500 nm) and (e) and (f) cross sections (scale bars at 2  $\mu\text{m}$ )

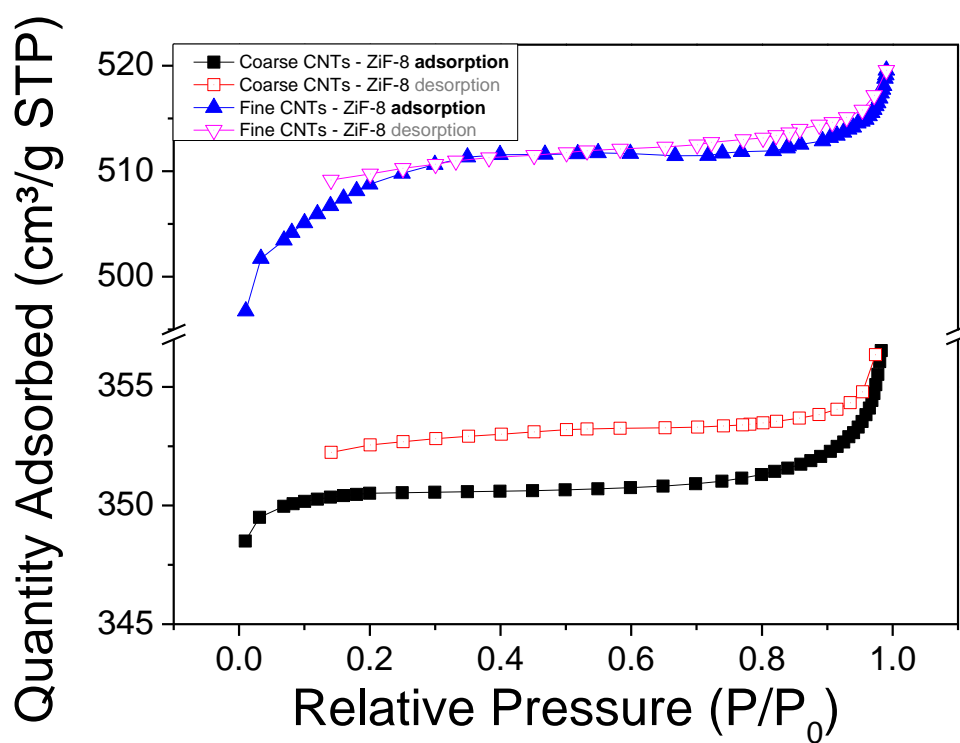

Figure S2 Representative isotherms for both ZIF-8 fine and coarse CNT composites in adsorption and desorption of  $\text{N}_2$  from the BET experiment.

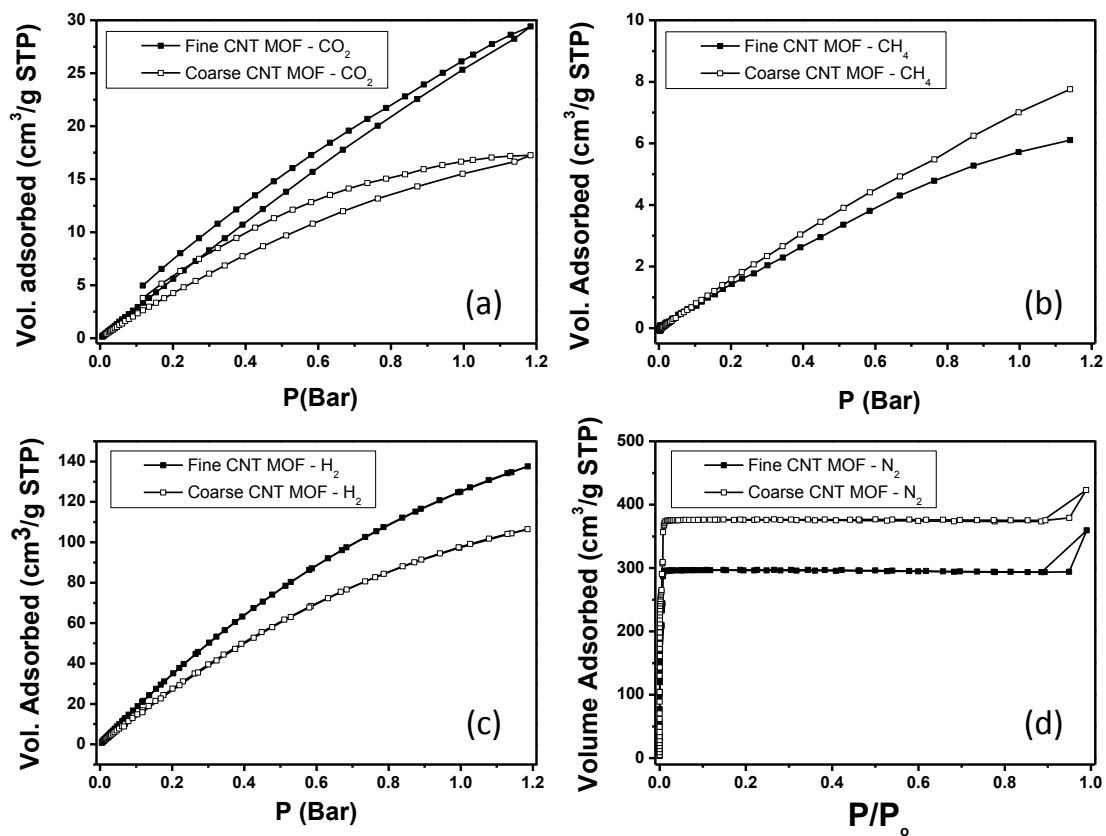

Figure S3 Adsorbed volumes for (a) CO<sub>2</sub> (277K), (B) CH<sub>4</sub> (277K), (c) H<sub>2</sub> (77K) and (d) N<sub>2</sub> (77K) under the conditions described in the experimental section

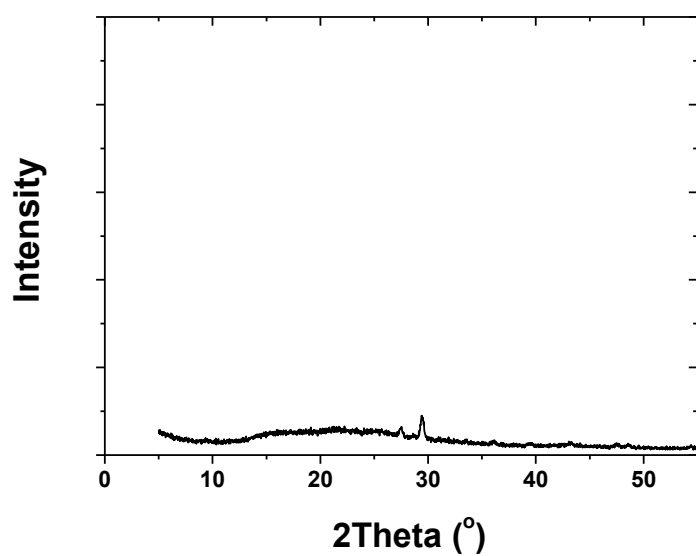

Figure S4 XRD pattern of the CNT BP without ZIF-8, scale is different than that presented in Figure 2 in order to resolve the broad diffraction peaks related to the CNTs

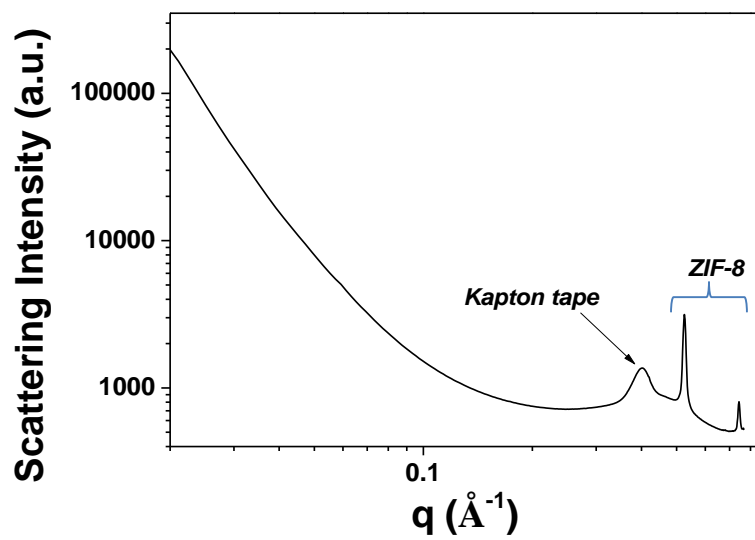

Figure S5 SAXS pattern of ZIF-8 powder sandwiched between two Kapton tape layers (camera length of 0.9 m; q window of [0.02; 0.85] Å<sup>-1</sup>)

Table S1 Morphology of the BP support layers

|              |      | BP Support layer        |                           |
|--------------|------|-------------------------|---------------------------|
| Property     | Unit | Fine CNTs <sup>25</sup> | Coarse CNTs <sup>25</sup> |
| CNT diameter | nm   | 10 (+/- 2)              | 40 (+/- 7)                |
| Porosity     | %    | 90                      | 85                        |
| Pore size    | nm   | 25 (+/-2)               | 50 (+/- 3)                |
| Thickness    | μm   | 10 (+/-2)               | 25 (+/-2)                 |

Table S2 Properties of the gas tested from<sup>35</sup>

|                 | Kinetic diameter | Molecular weight |
|-----------------|------------------|------------------|
|                 | Å                | Da               |
| He              | 2.6              | 4                |
| CO <sub>2</sub> | 3.3              | 44               |
| Ar              | 3.4              | 39.44            |
| CH <sub>4</sub> | 3.8              | 16.04            |
| N <sub>2</sub>  | 3.64             | 28               |
| Xe              | 3.96             | 131.29           |
